# Supplementary material
Source: PubMed Central journal article supplement (PMC2957205)

Figure 3A

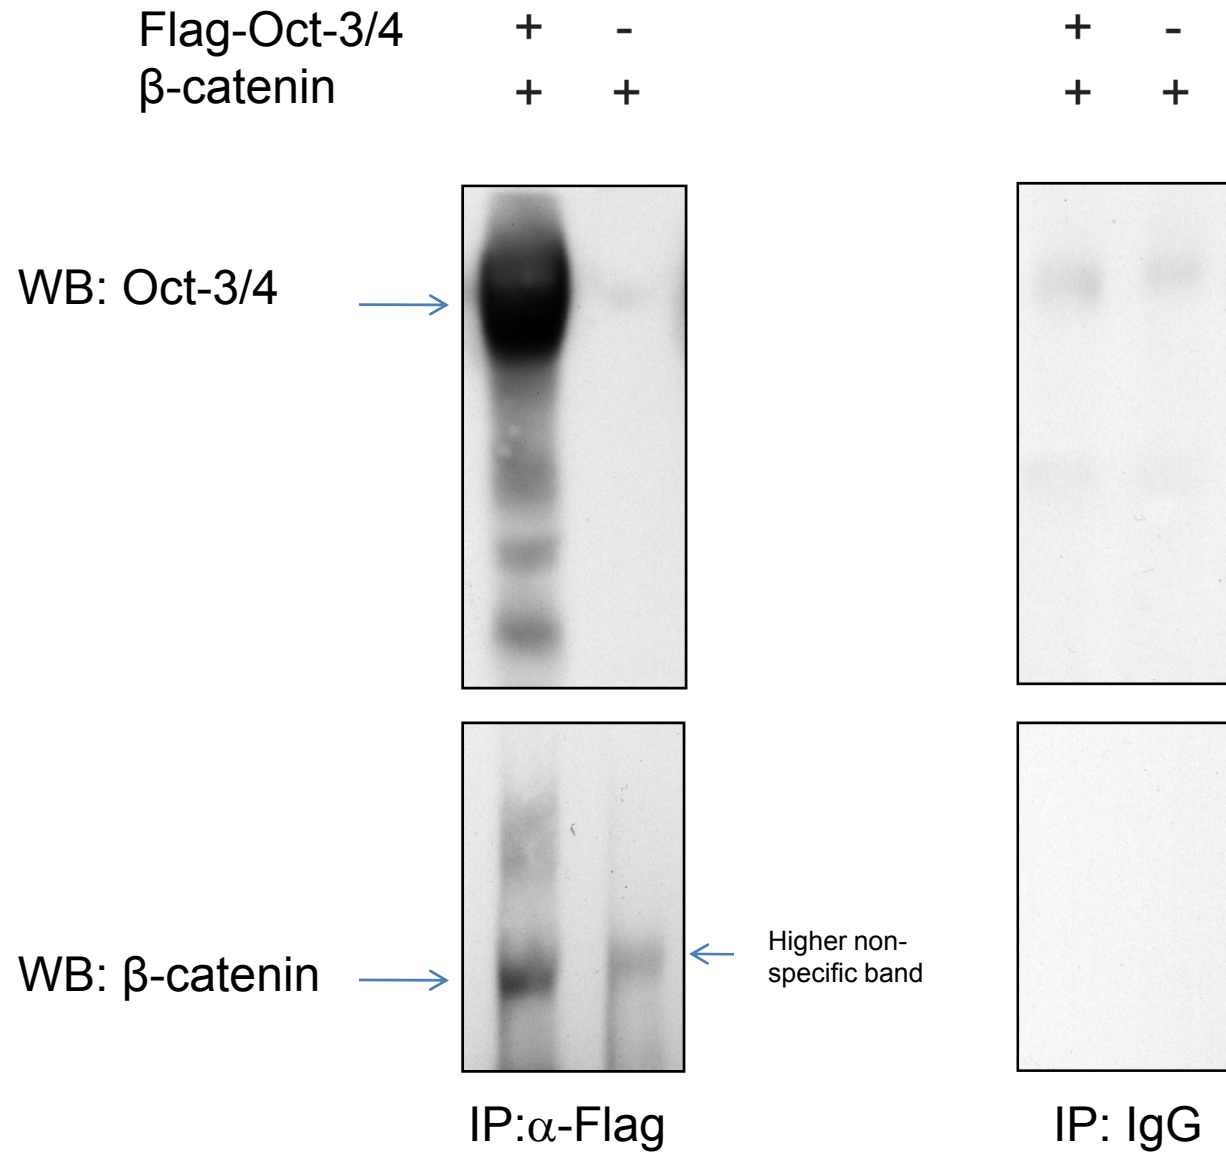

Figure 3B

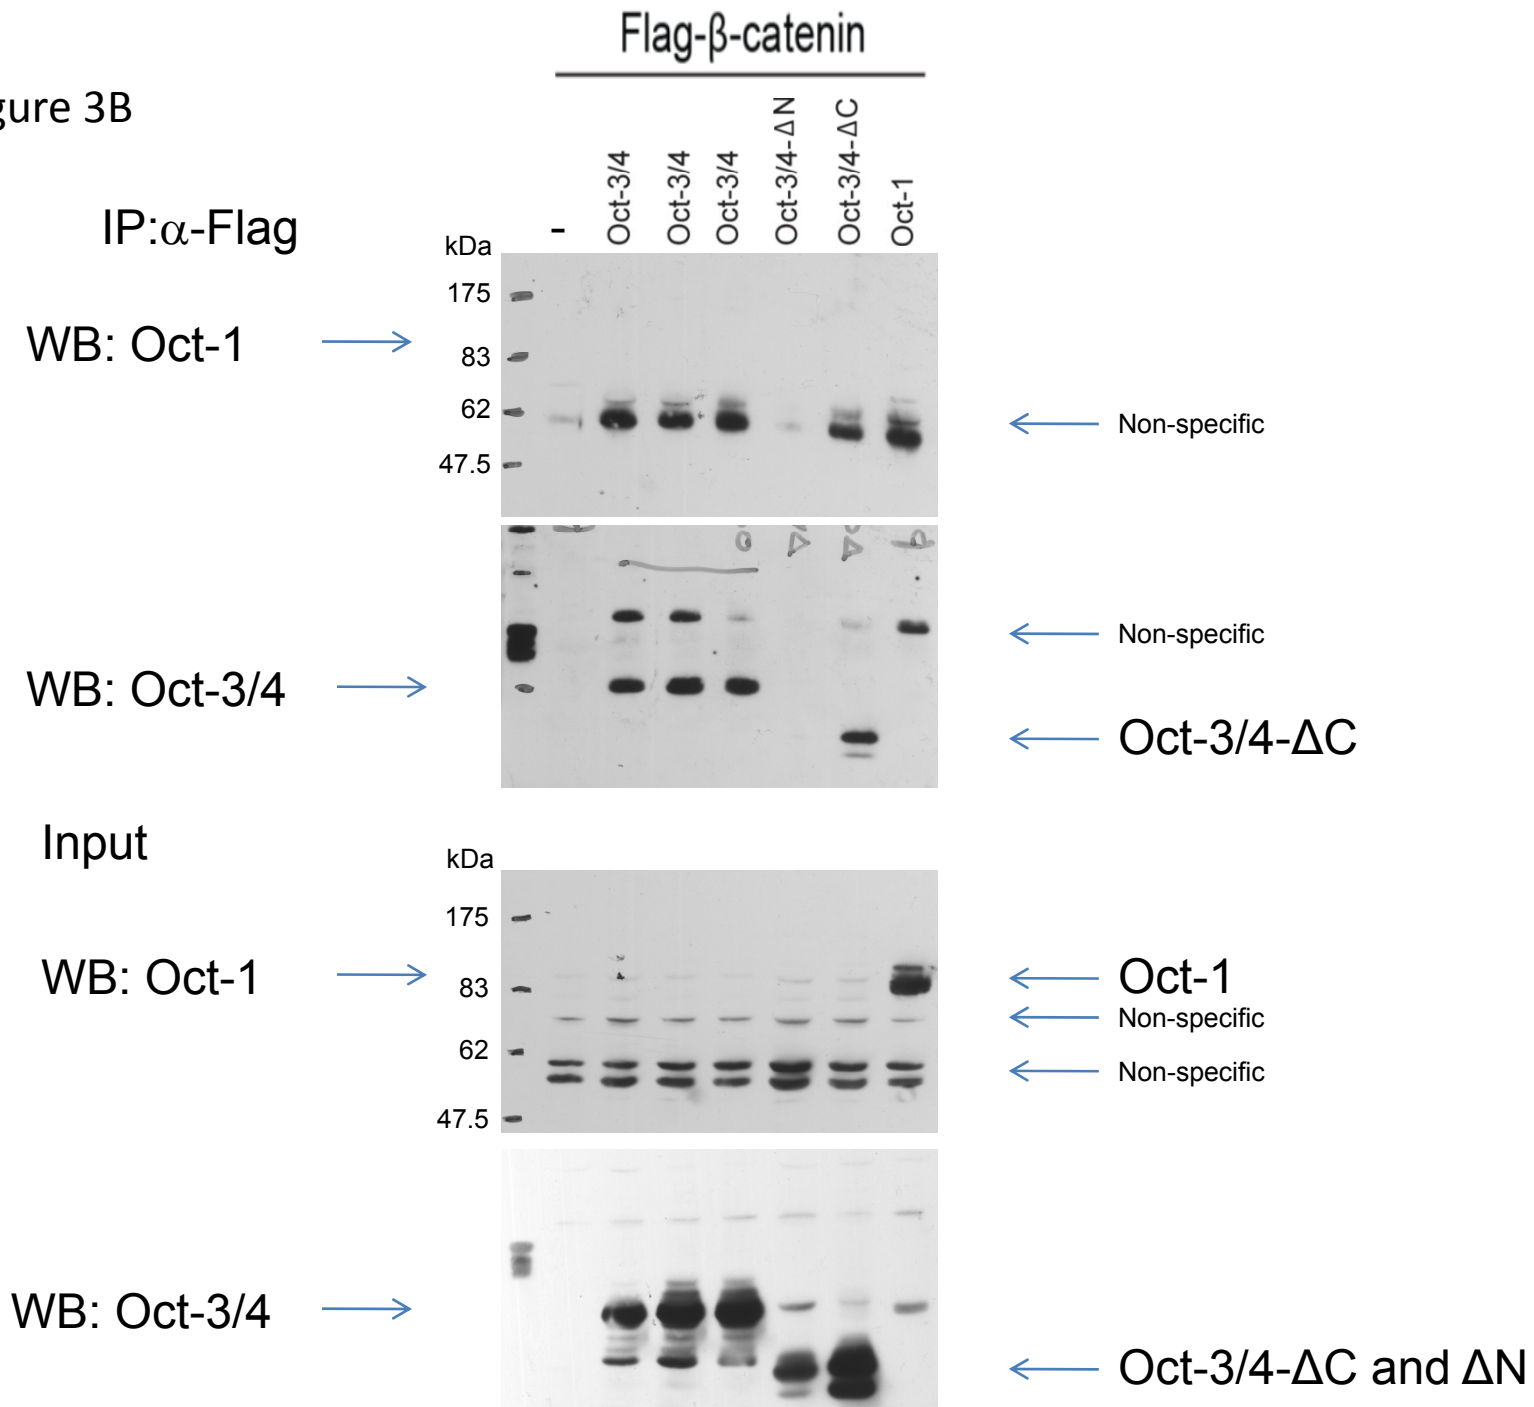

Figure 3C Flag-Axin1

Oct-3/4

|   |   |   |   |   |   |   |   |
|---|---|---|---|---|---|---|---|
| - | + | - | + | - | + | - | + |
| - | - | + | + | - | - | + | + |

WB: Oct-3/4 →

← Non-specific immunoglobulin heavy chain band

WB: Flag →

WB:  $\beta$ -catenin →

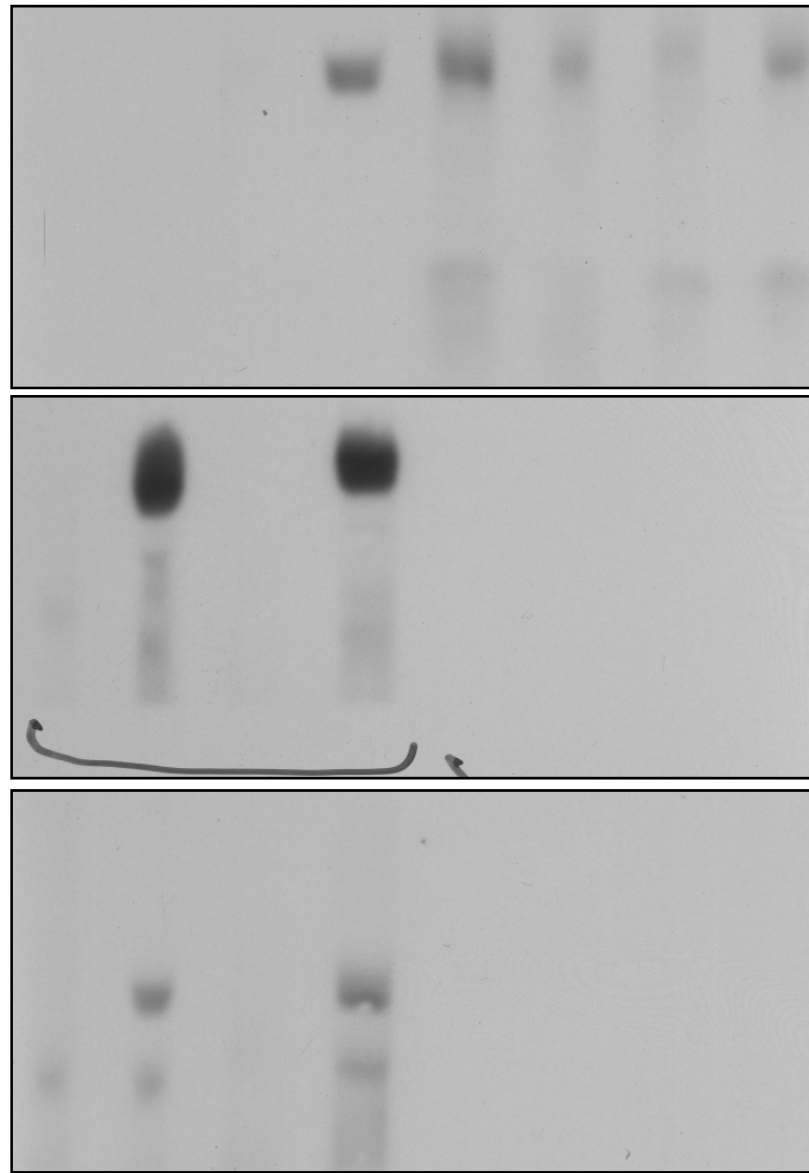

IP:  $\alpha$ -Flag

IP: IgG

Figure 3D

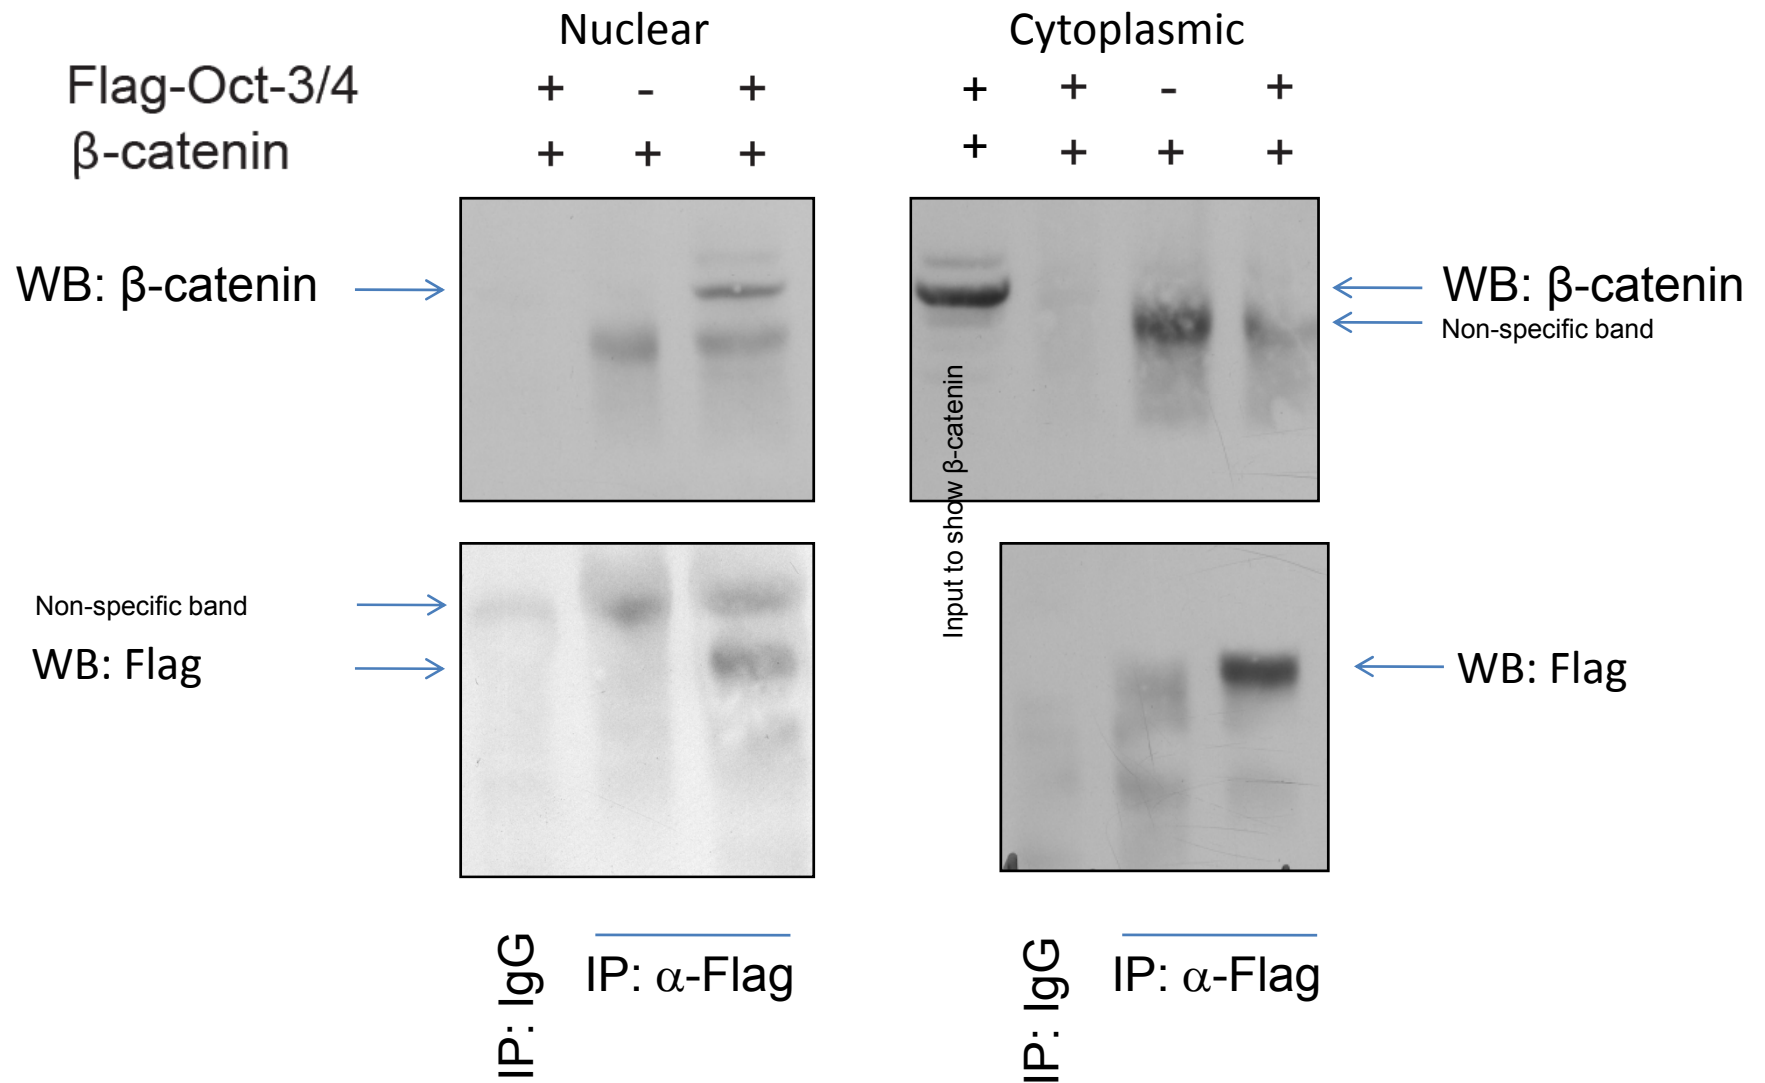

Figure 3D continue

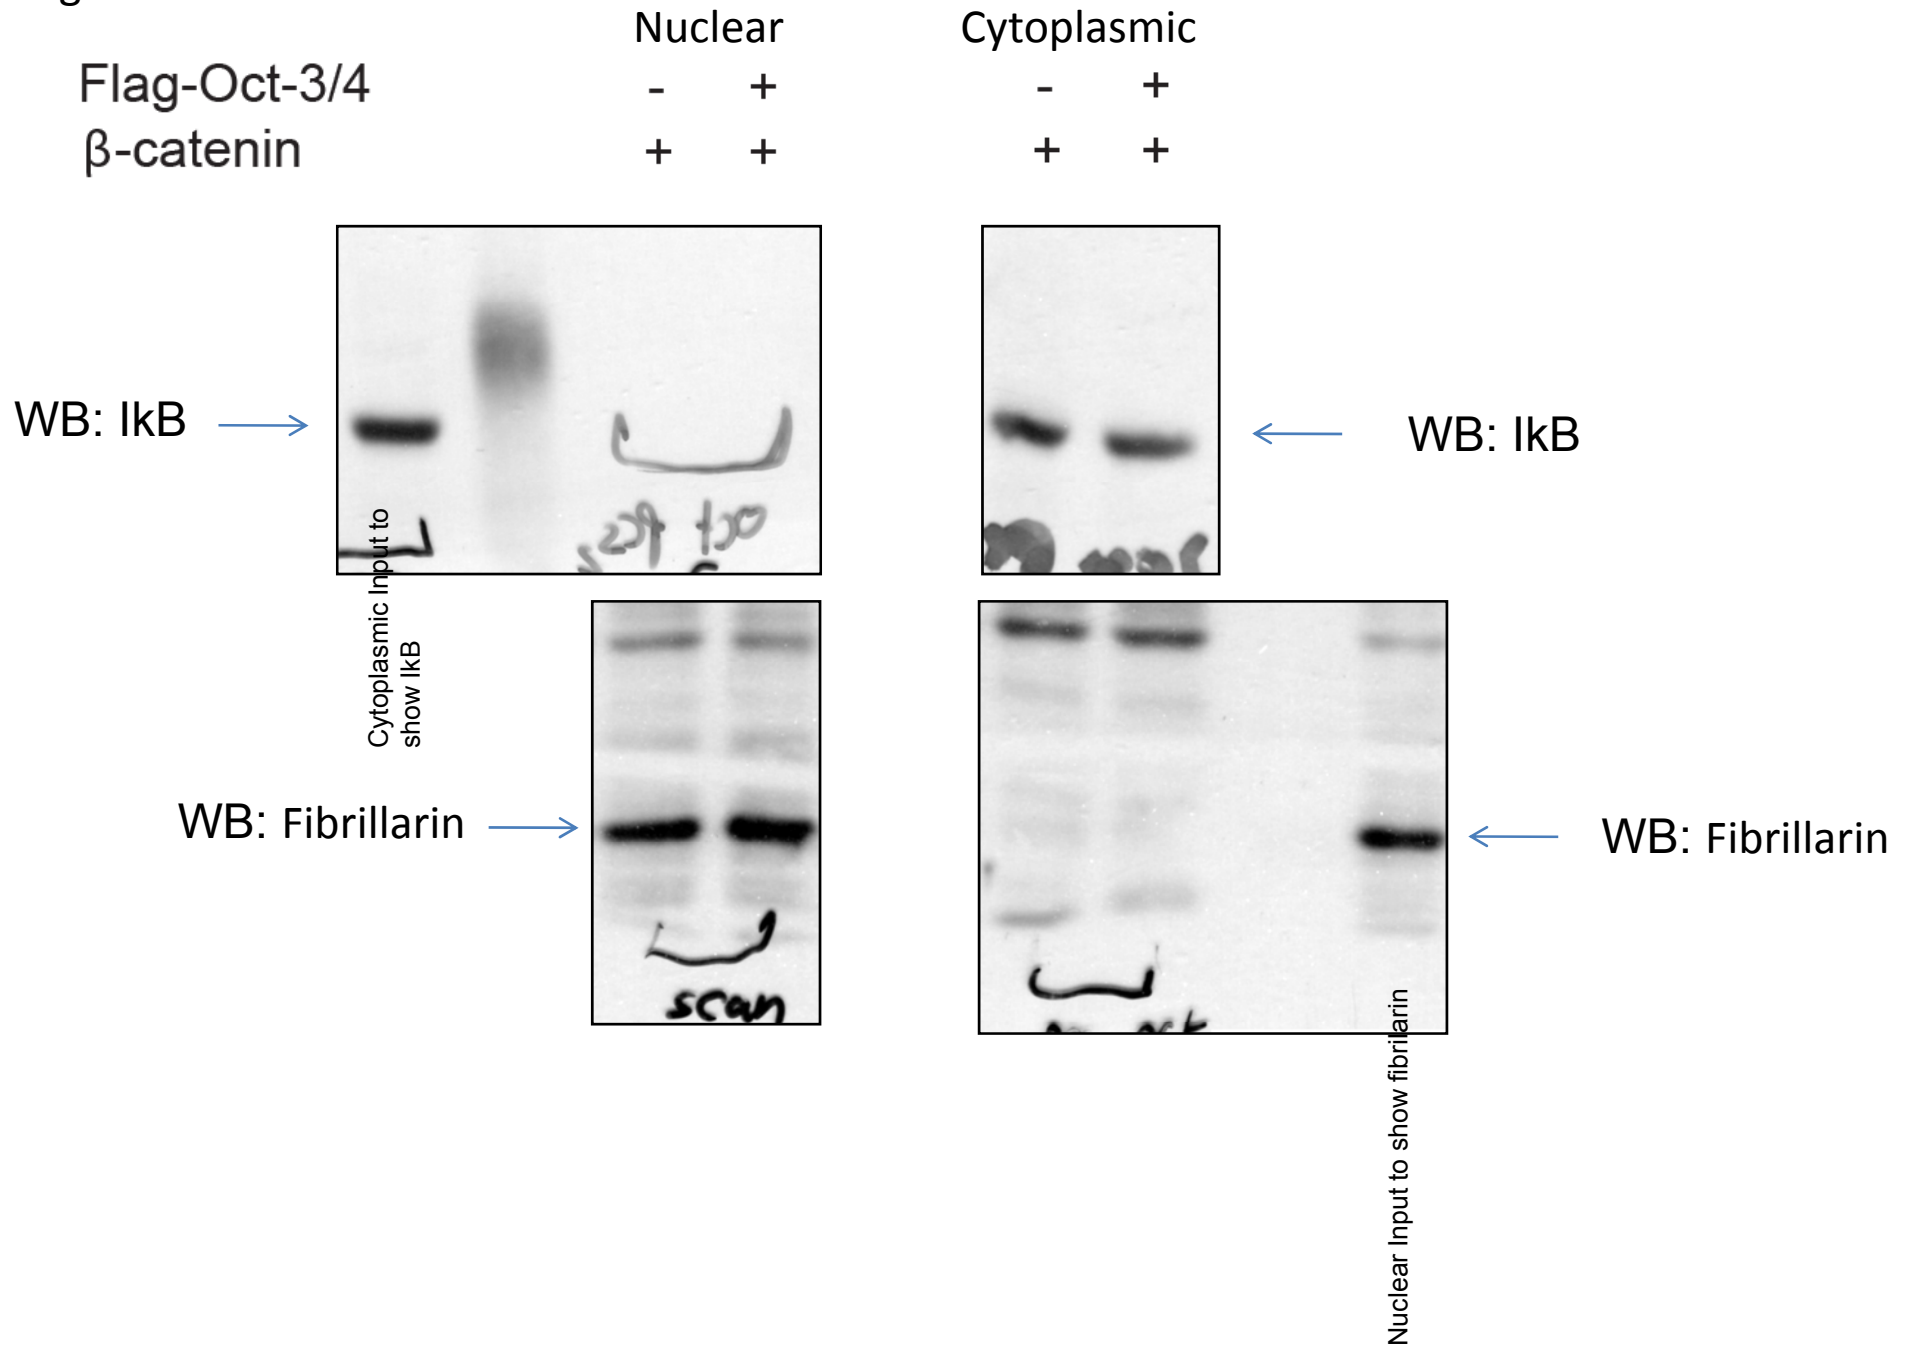

Figure 3E

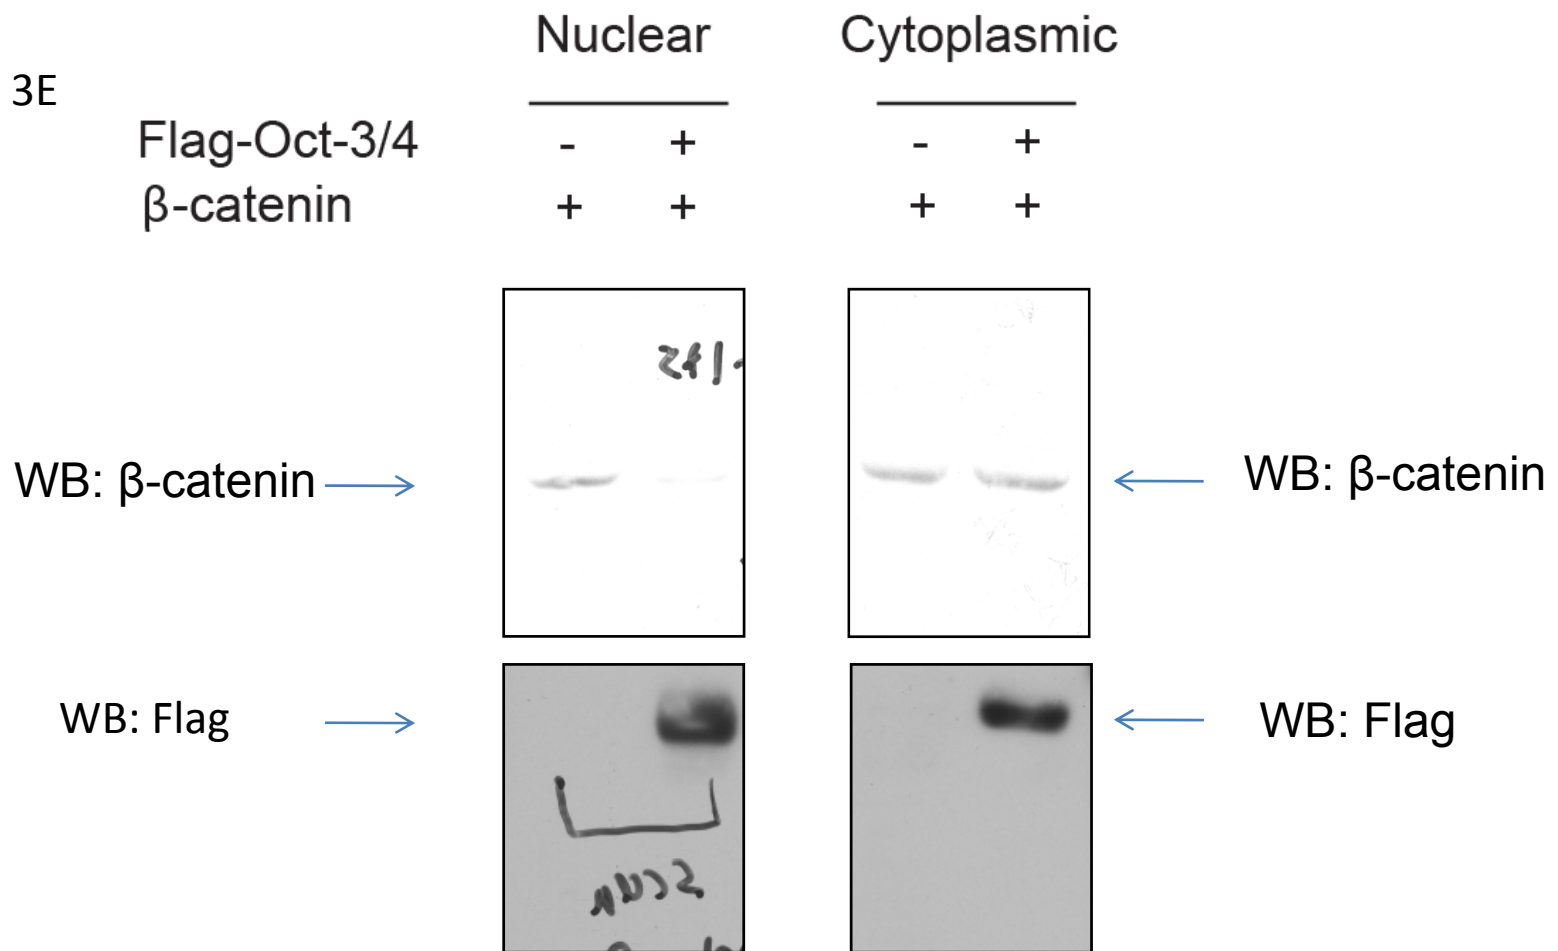

Figure 3E continue

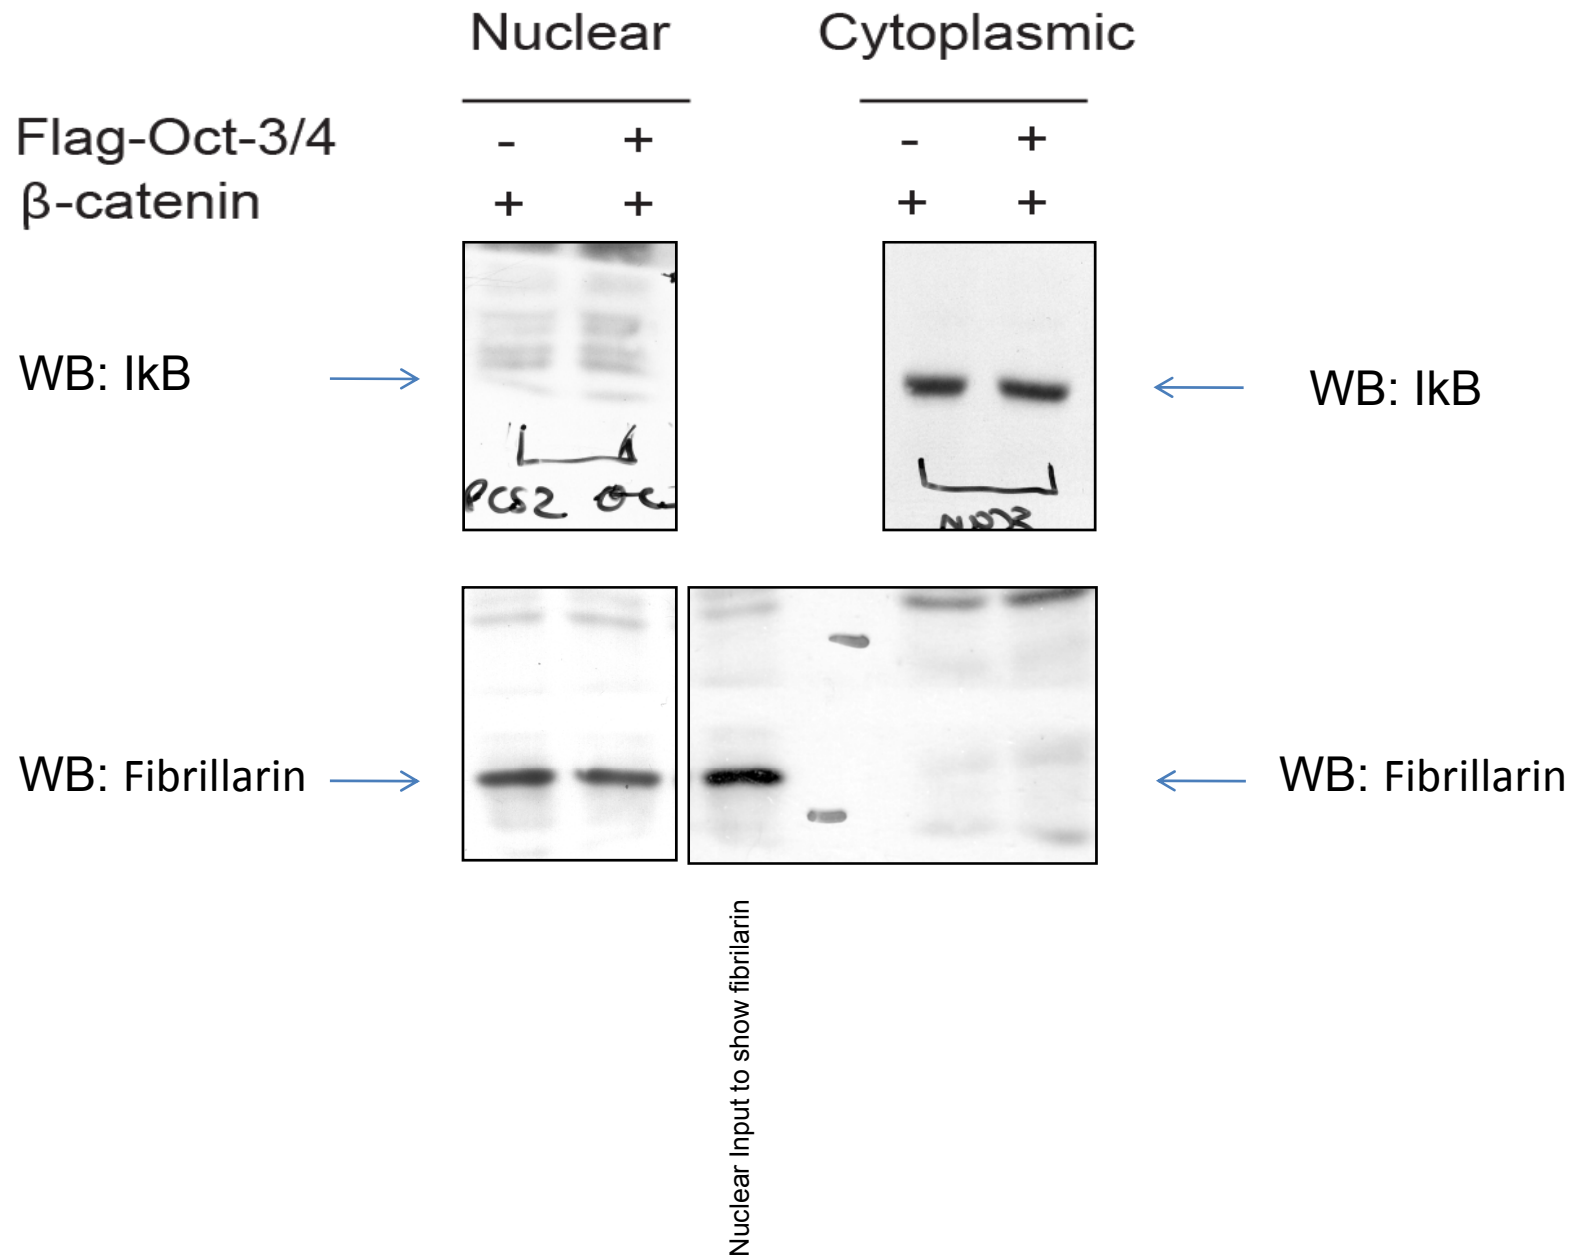

Figure 3F

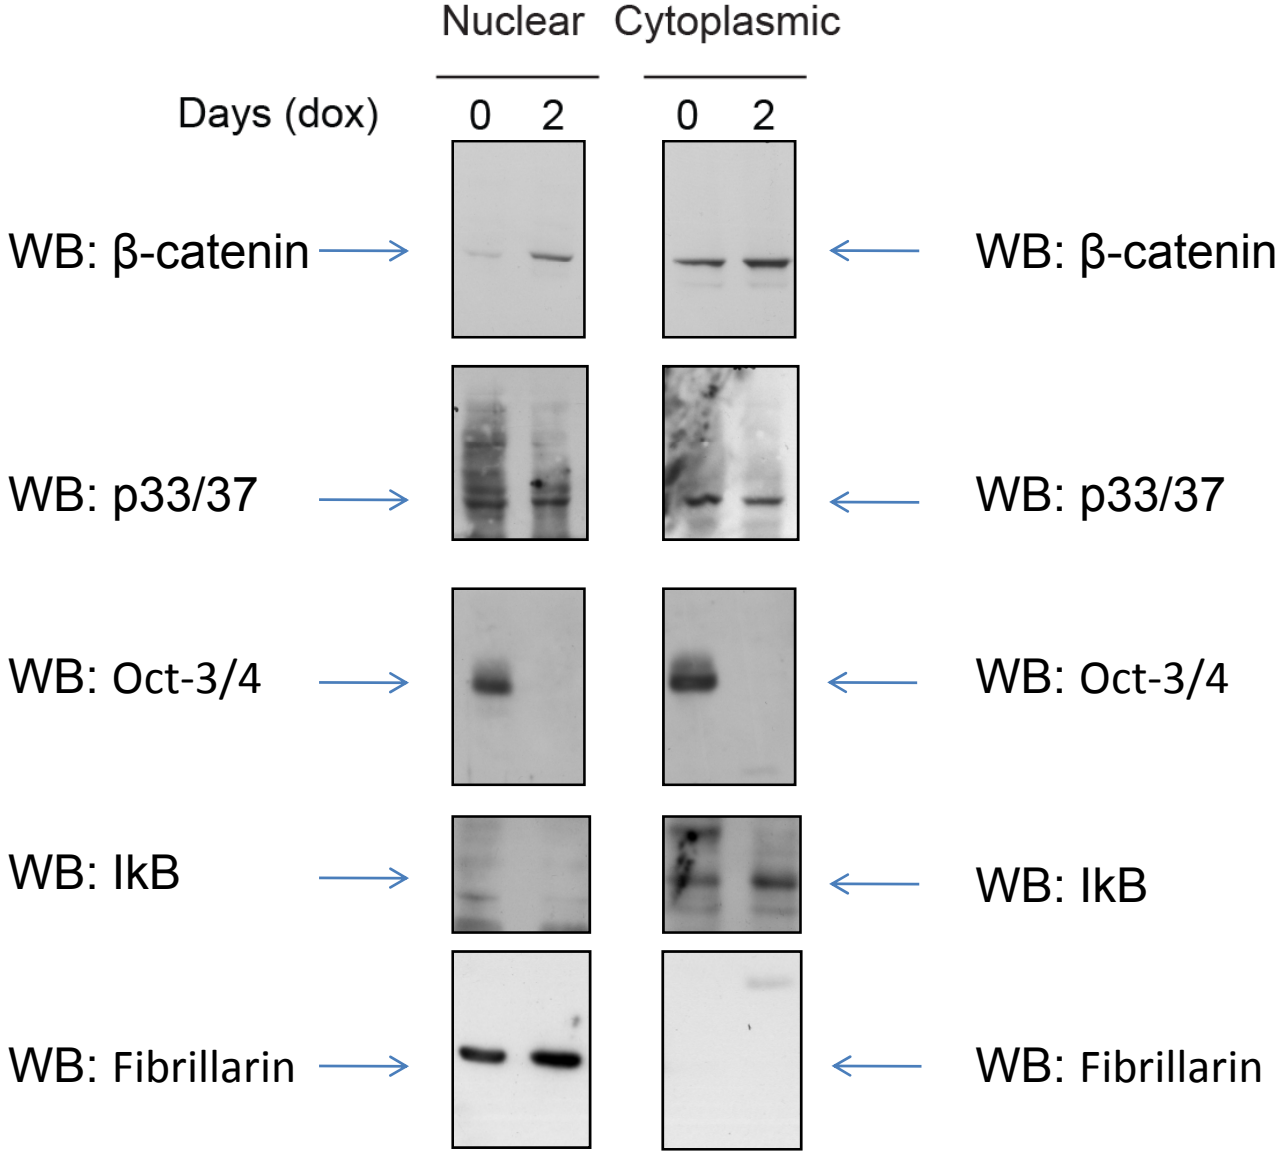



Figure 3G

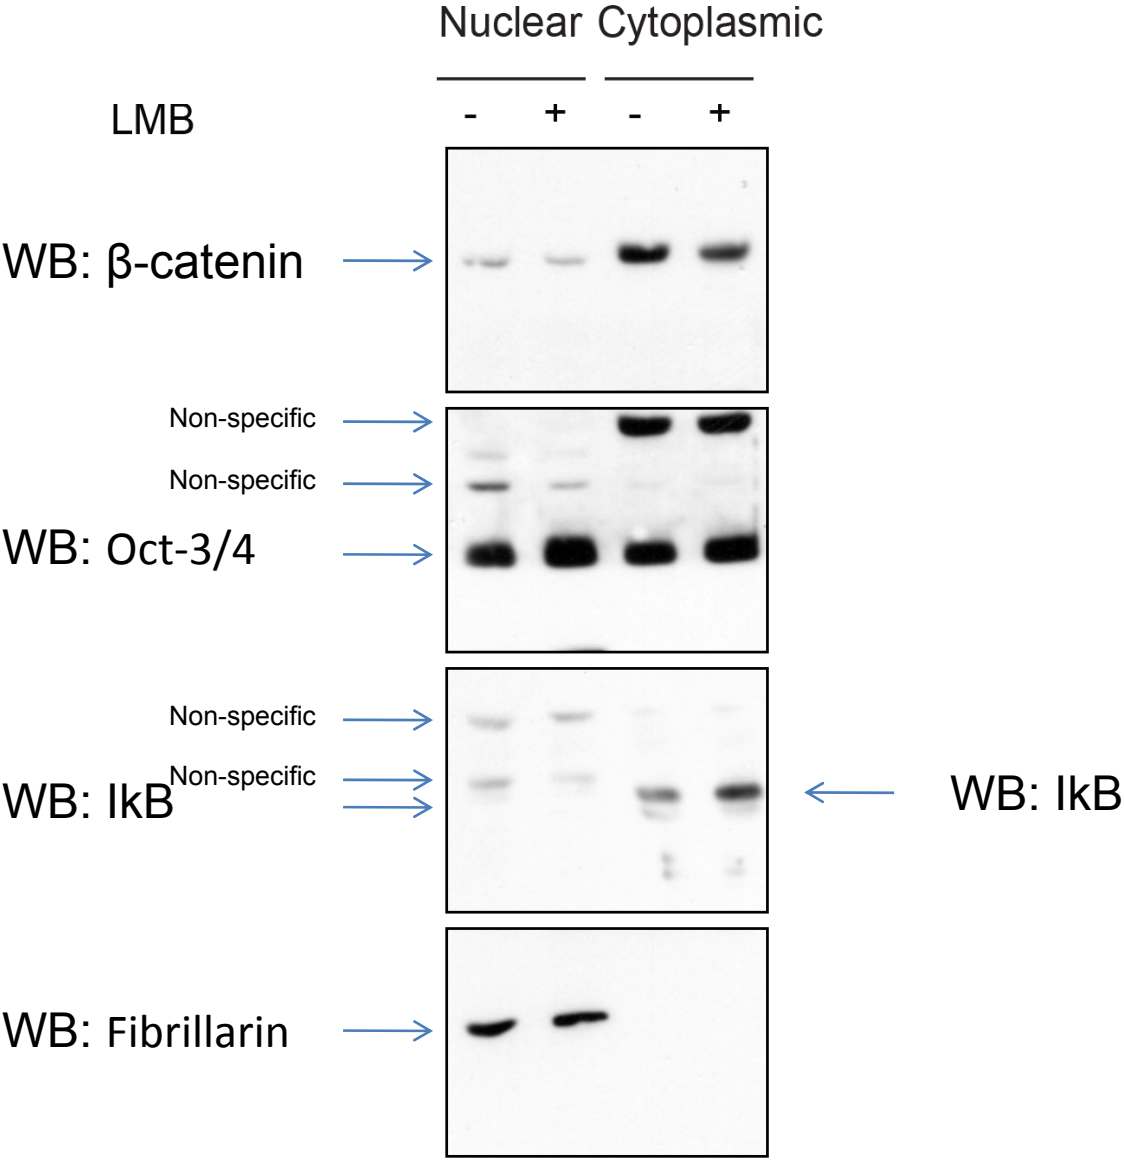

Supplementary Figure 2A

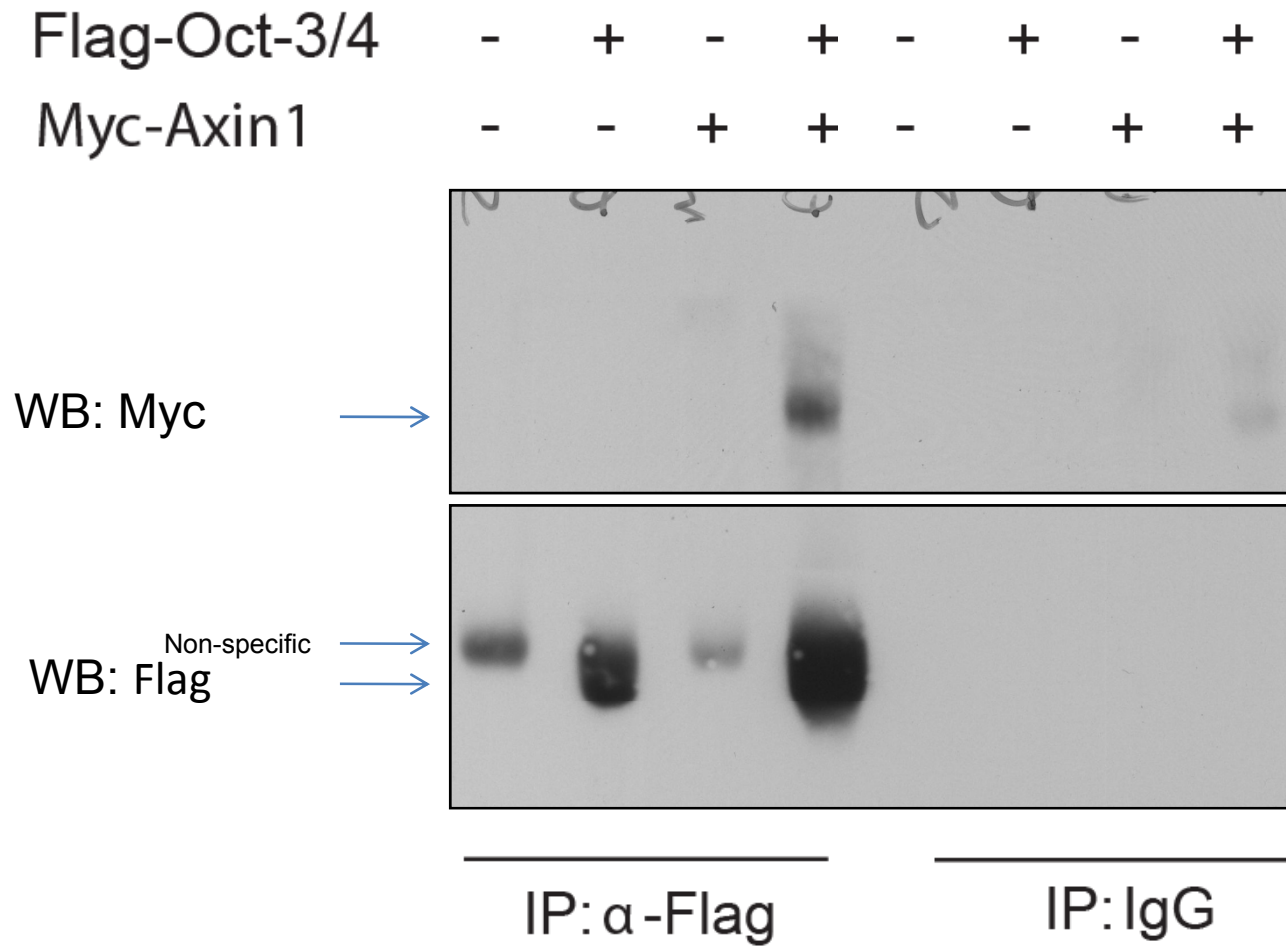

# Supplementary Figure 2B

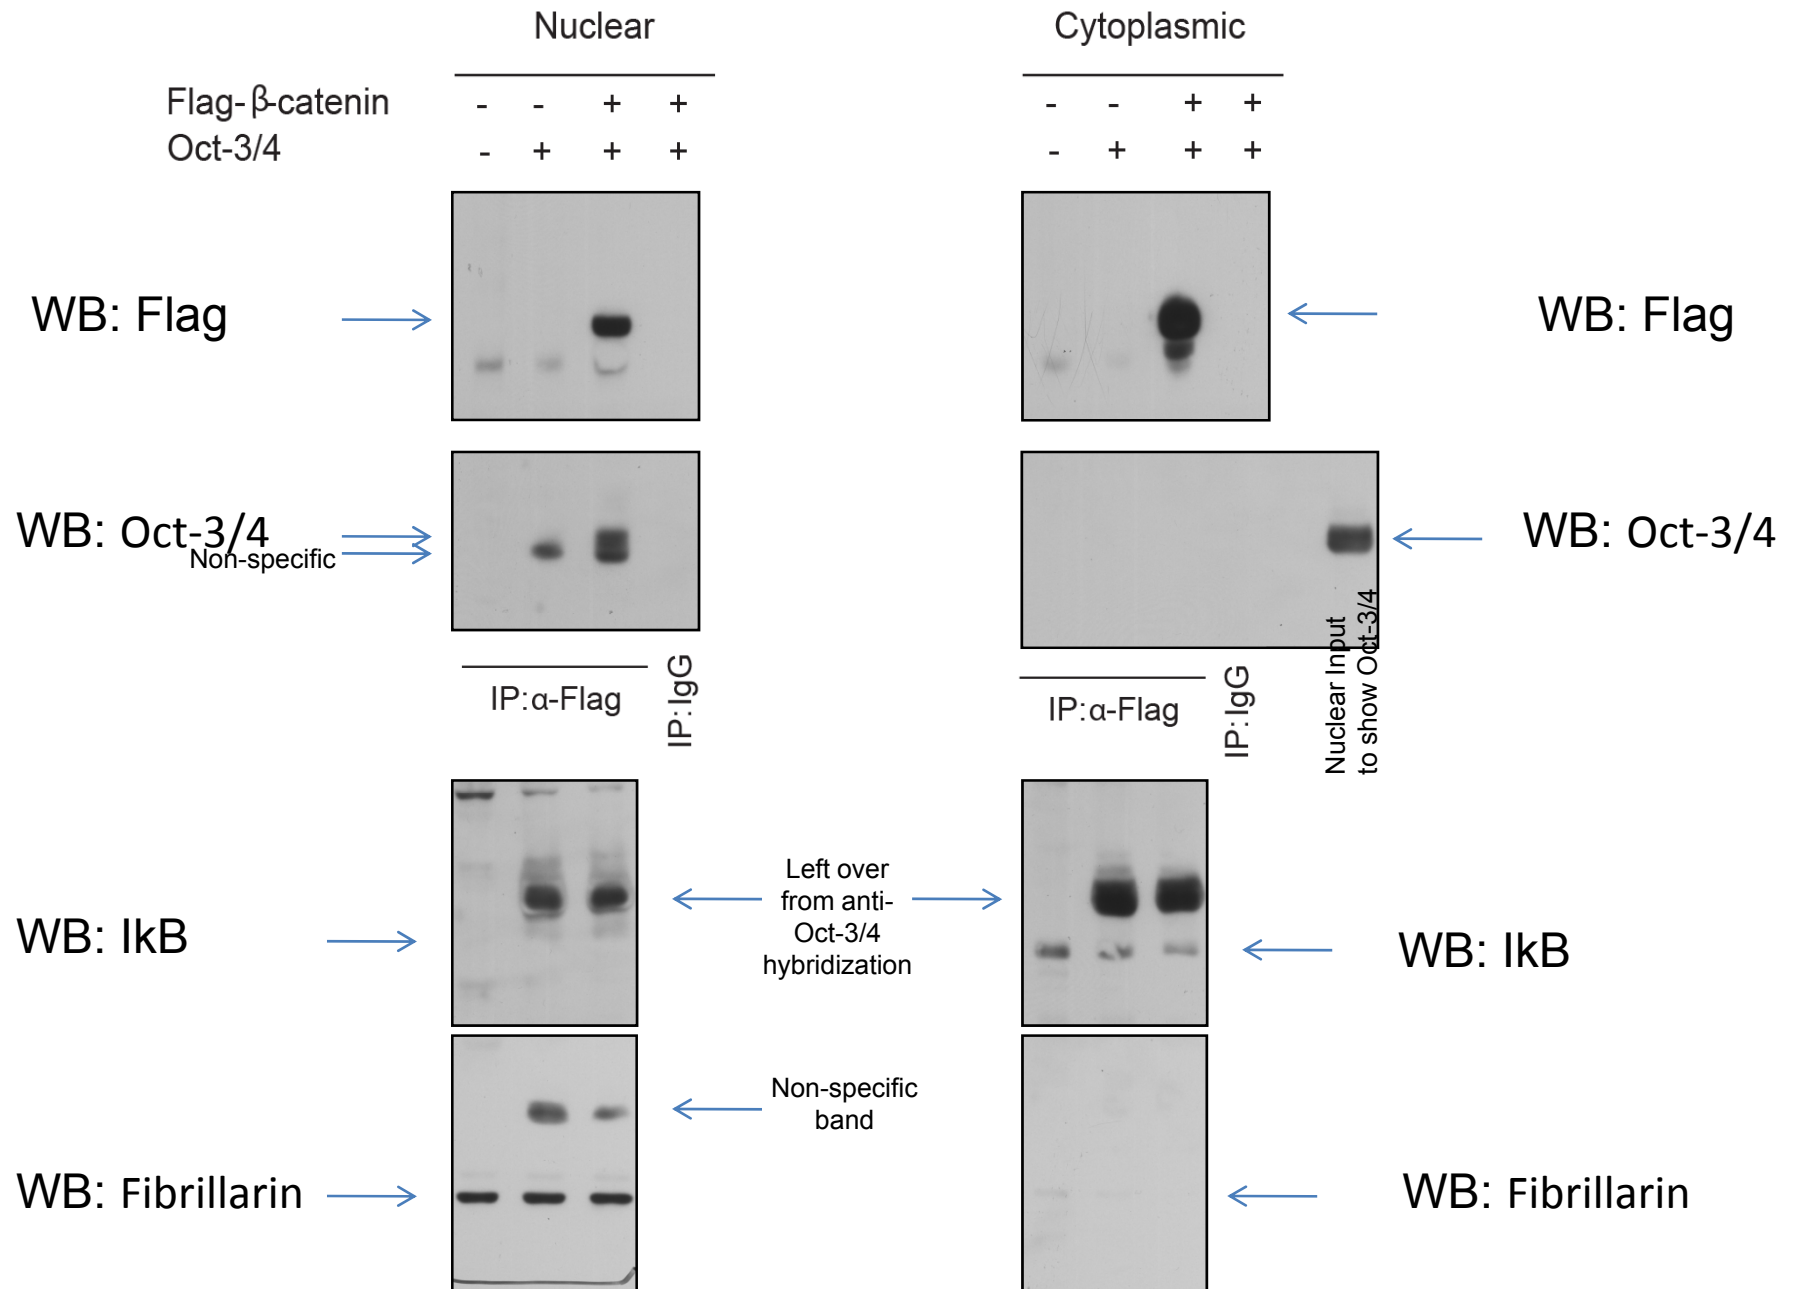

# Supplementary Figure 2C

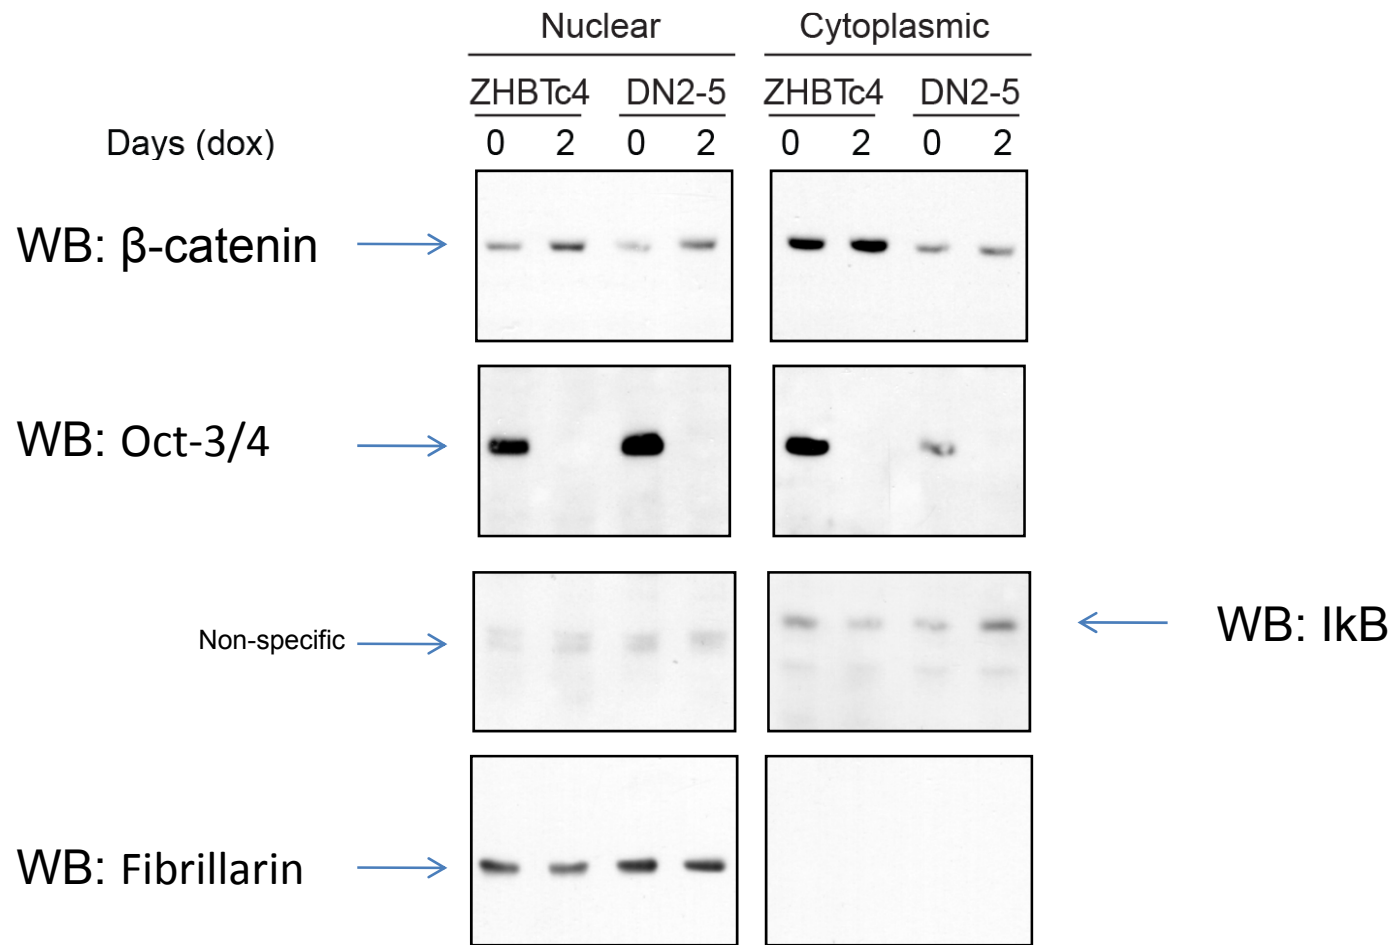

# Supplementary Figure 2D

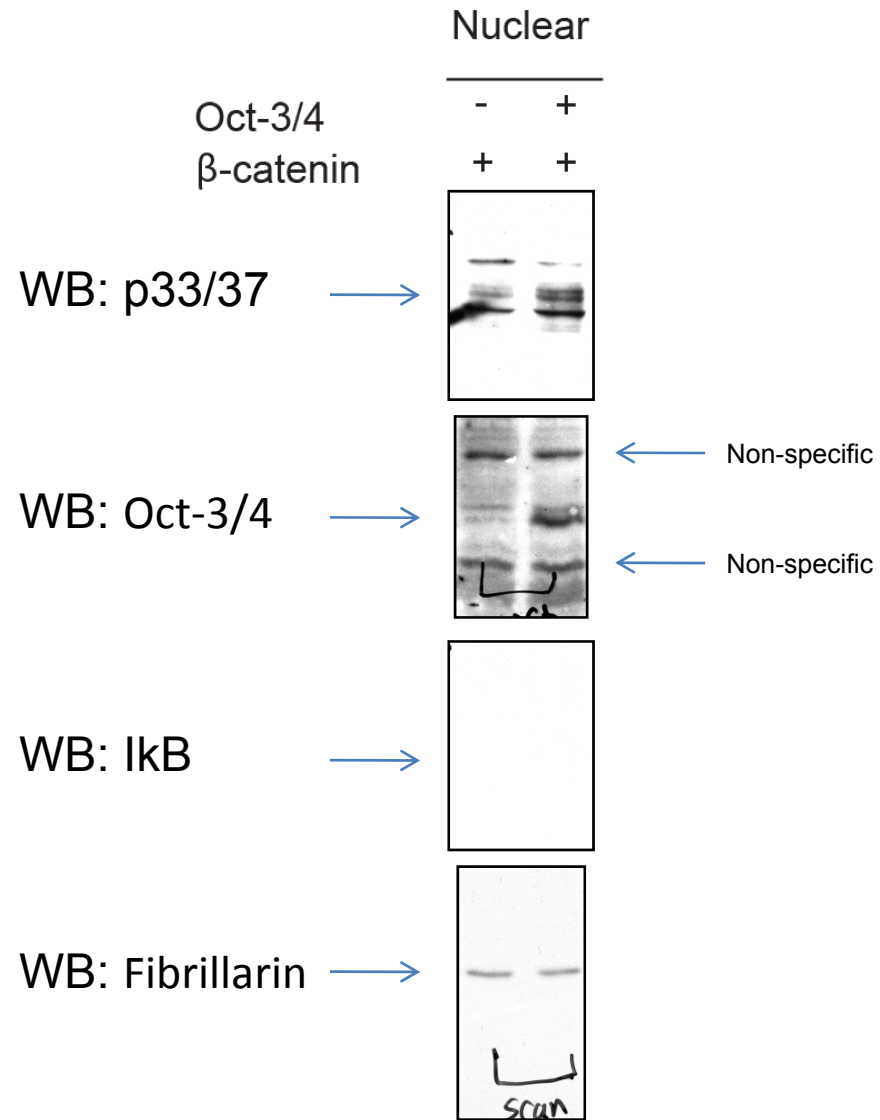

Supplement: emboj2010200s2.pdf [file emboj2010200s2.pdf]
